# Supplementary material for: Intestinal Microbiome Changes and Clinical Outcomes of Patients with Ulcerative Colitis after Fecal Microbiota Transplantation
Source: MDPI journal article supplement (doi:10.3390/jcm12247702), 2023-12-15
Supplement: s1 [file s1]

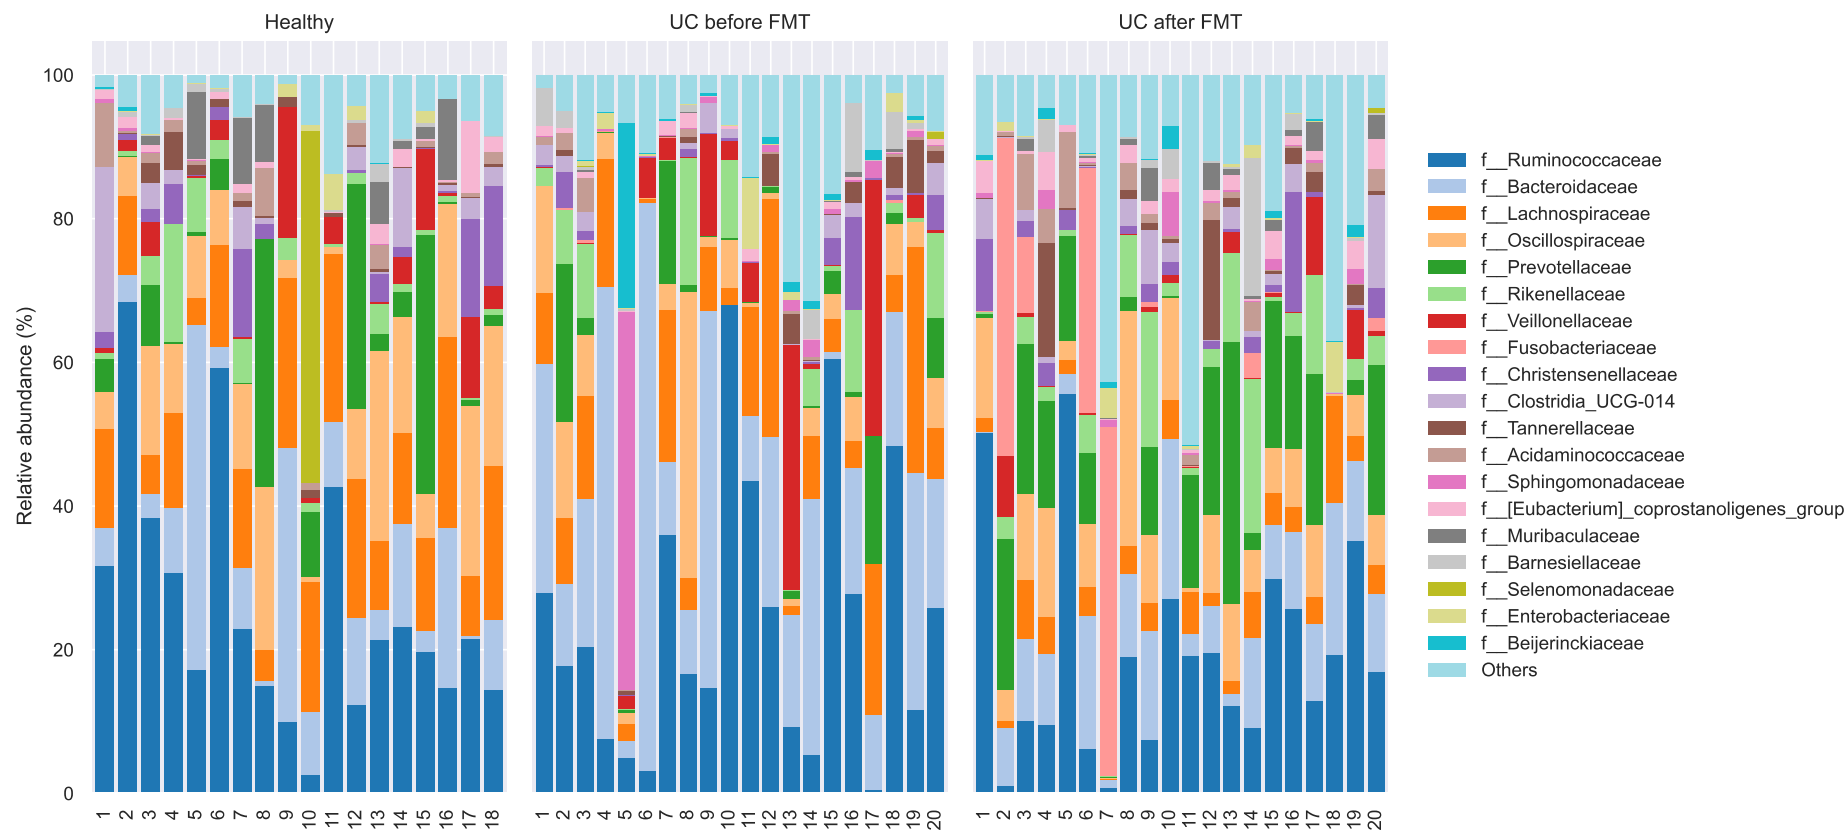

**Figure S1.** Taxonomic classification of OTUs at the family level based on the Silva v.132 (full) database.
