# Supplementary material for: Intestinal Microbiome Changes and Clinical Outcomes of Patients with Ulcerative Colitis after Fecal Microbiota Transplantation
Source: MDPI journal article supplement (doi:10.3390/jcm12247702), 2023-12-15
Supplement: s1 [file s1]

**Table S1.** The condition of patients with UC before and after FMT according to the survey.

| Patient | Sex | Age | Clinical remission or re response at week 8 | Improvements after FMT (interview) | Total duration of improvements, months | Current number of defecations per day* |           | Presence of blood in the stool at the time of survey* |           | Suggested cause of recurrence                                                           | Supporting medications used                                    |
|---------|-----|-----|---------------------------------------------|------------------------------------|----------------------------------------|----------------------------------------|-----------|-------------------------------------------------------|-----------|-----------------------------------------------------------------------------------------|----------------------------------------------------------------|
|         |     |     |                                             |                                    |                                        | Before FMT                             | After FMT | Before FMT                                            | After FMT |                                                                                         |                                                                |
| 1       | F   | 29  | rem                                         | +                                  | 18**                                   | 2-3                                    | 1-2       | +                                                     | -         |                                                                                         | Mesalazine                                                     |
| 2       | F   | 42  | rem                                         | +                                  | 6                                      | 1-2                                    | 1-2       | +                                                     | -         | Severe stress                                                                           | Azathioprine, Mesalazine                                       |
| 3       | M   | 57  | rem                                         | +                                  | 24                                     | 5                                      | 2-3       | +                                                     | -         | Surgery (cholecystostomy) or treatment of pneumonia with a triple course of antibiotics |                                                                |
| 4       | M   | 34  | res                                         | +                                  | 48**                                   | 7-8                                    | Up to 3   | -                                                     | -         |                                                                                         | Sulfasalazine, Mesalazine                                      |
| 6       | F   | 34  | res                                         | -                                  | 2                                      | 4                                      | 2         | +                                                     | +         |                                                                                         | Mesalazine                                                     |
| 8       | M   | 42  | rem                                         | +                                  | 6**                                    | 2-3                                    | 1         | +                                                     | -         |                                                                                         | Mesalazine                                                     |
| 9       | F   | 25  | rem                                         | +                                  | 6**                                    | 1-2                                    | 1-2       | -                                                     | -         |                                                                                         | Mesalazine, Kolofort, Prednisolone, 6-Mercaptopurine, Zakofalk |
| 12      | M   | 36  | rem                                         | +                                  | 24**                                   | 1                                      | 1-2       | -                                                     | -         |                                                                                         | Mesalazine                                                     |
| 14      | F   | 34  | res                                         | -                                  | 2                                      | 2-8                                    | Up to 16  | +                                                     | +         |                                                                                         | Mesalazine, Zakofalk                                           |
| 15      | M   | 46  | res                                         | +                                  | 4                                      | 1                                      | 1         | +                                                     | -         |                                                                                         |                                                                |
| 17      | M   | 36  | rem                                         | +                                  | 4                                      | 1                                      | 1         | -                                                     | +         | Diet violation                                                                          | Mesalazine                                                     |
| 19      | F   | 26  | rem                                         | +                                  | 24**                                   | Up to 4                                | 1         | +                                                     | -         |                                                                                         | Mesalazine, Trimedat                                           |
| 20      | M   | 34  | rem                                         | +                                  | 6                                      | Up to 5                                | 2-12      | +                                                     | +         | Preparation for sigmoidoscopy                                                           | GCS, Mesalazine                                                |

\* At the time of the survey. \*\* No recurrences of the disease at the time of the survey.

**Table S2.** Shannon indices for patients before and after FMT

| Patient | Shannon index before FMT | Shannon index after FMT |
|---------|--------------------------|-------------------------|
| 1       | 5.03                     | 3.92                    |
| 2       | 6.16                     | 3.40                    |
| 3       | 5.90                     | 5.76                    |
| 4       | 2.77                     | 5.94                    |
| 5       | 3.27                     | 3.37                    |

|    |      |      |
|----|------|------|
| 6  | 3.28 | 5.10 |
| 7  | 5.03 | 3.33 |
| 8  | 5.82 | 6.14 |
| 9  | 3.84 | 6.49 |
| 10 | 3.08 | 5.62 |
| 11 | 4.86 | 5.57 |
| 12 | 4.44 | 5.63 |
| 13 | 4.72 | 5.77 |
| 14 | 5.76 | 5.55 |
| 15 | 4.83 | 6.16 |
| 16 | 5.23 | 5.78 |
| 17 | 4.63 | 5.94 |
| 18 | 4.88 | 4.92 |
| 19 | 4.87 | 5.59 |
| 20 | 5.77 | 6.49 |
