# Supplementary figures and images for: Intestinal Microbiome Changes and Clinical Outcomes of Patients with Ulcerative Colitis after Fecal Microbiota Transplantation
Source: MDPI journal article supplement (doi:10.3390/jcm12247702), 2023-12-15

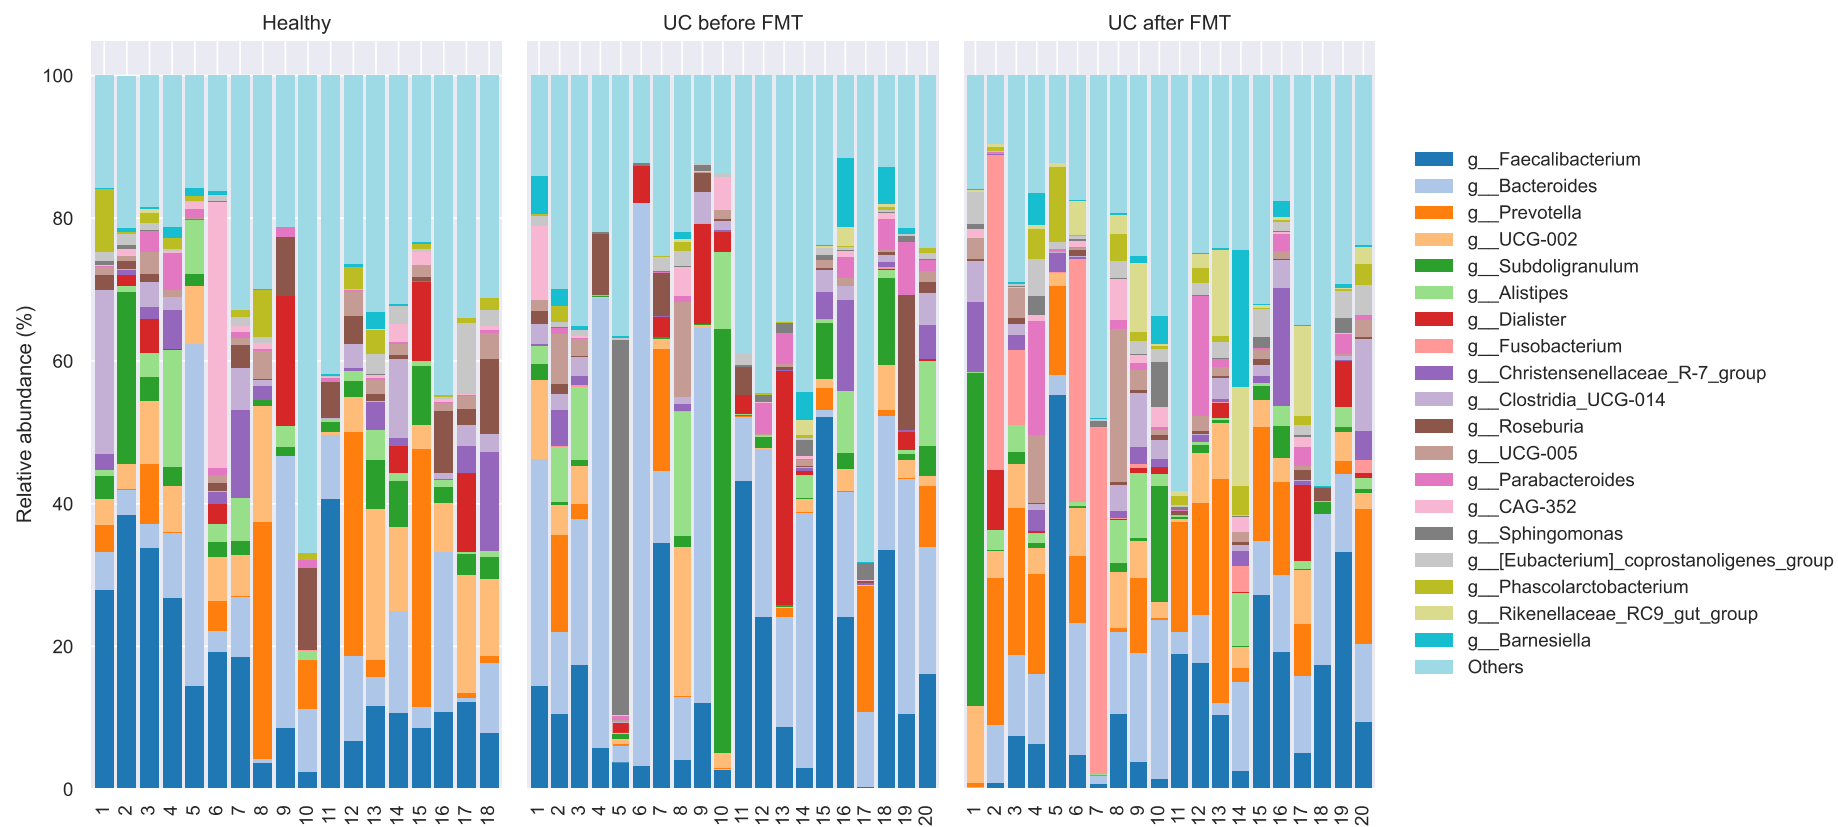

**Figure S2.** Taxonomic classification of OTUs at the genus level based on the Silva v.132 (full) database.

Supplement: s1 [file s1]
